# Supplementary material for: Change of the Neutrophil-to-Lymphocyte Ratio during Treatment: A Potential Prognostic Biomarker in Metastatic Prostate Cancer Treated with Radium-223 Dichloride
Source: MDPI journal article supplement (doi:10.3390/cancers14194606), 2022-09-22

## Supplementary Materials

**Table S1:** Adjustment variables in multivariate Cox proportional hazards regression model predicting over-all survival in Radium-223 treated patients.

|                                  | HR   | 95%CI      | P-Value |
|----------------------------------|------|------------|---------|
| <b>Prior Docetaxel treatment</b> | 2.09 | 1.24-3.52  | 0.005   |
| <b>Previous prostatectomy</b>    | 0.32 | 0.07-1.52  | 0.15    |
| <b>ECOG</b>                      | 2.5  | 1.14       | 0.02    |
| <b>PSA levels</b>                | 1.0  | 1.0-1.001  | 0.06    |
| <b>tALP (IU/L)</b>               | 1    | 0.99-1.0   | 0.10    |
| <b>Hb (g/L)</b>                  | 0.96 | 0.95-0.98  | 0       |
| <b>NLR &gt;5</b>                 | 1.7  | 1.0 – 2.90 | 0.05    |

Hazard Ratio (HR), Eastern Cooperative Group (ECOG) performance status, prostate specific antigen (PSA) level, hemoglobin level (Hb), total alkaline phosphatase (tALP)

**Figure S1:** Relation between absolute change of Neutrophil to lymphocyte ratio and Hazard Ratio for overall survival for Radium-223 treated patients and Docetaxel treated patients.

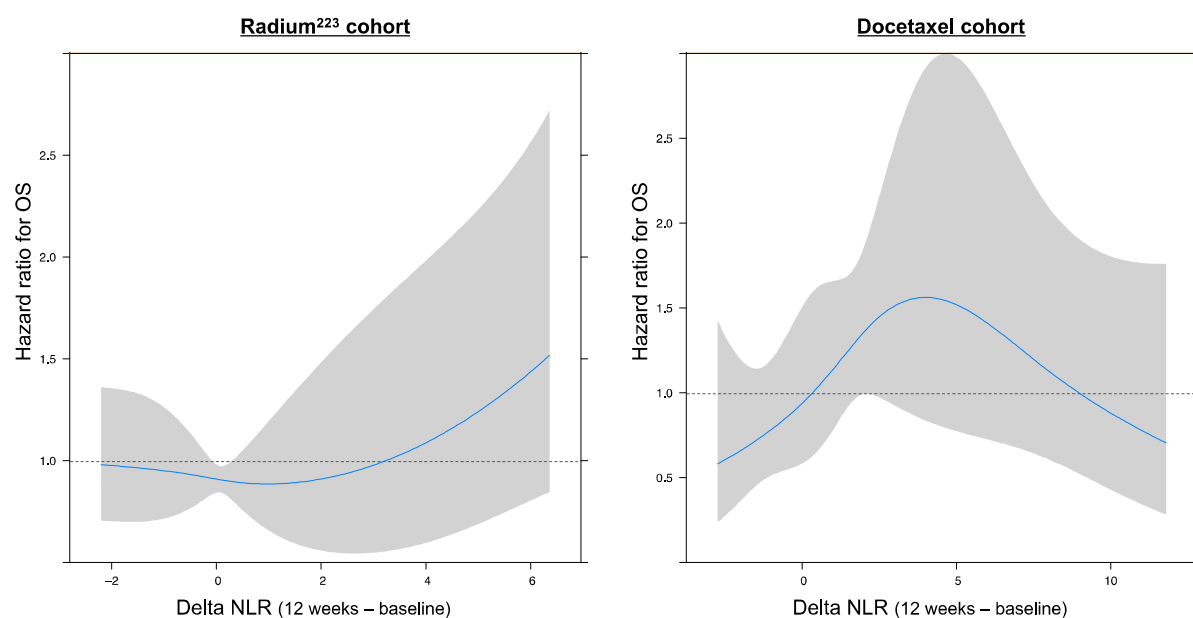

Delta NLR (Neutrophil to lymphocyte ratio) measured as NLR at 12 weeks minus NLR at baseline.

**Figure S2:** Evolution of absolute neutrophil count and absolute lymphocyte count during therapy with Ra-dium-223 treated patients.

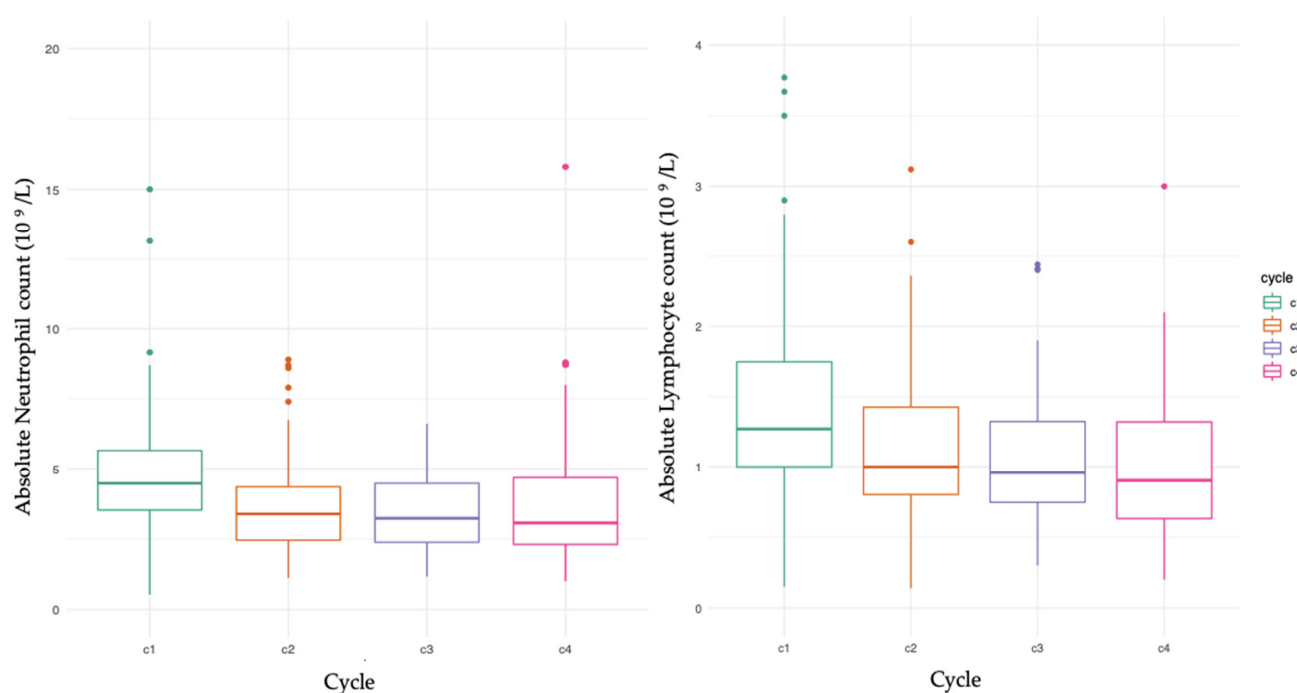

**Table S2:** Adjustment variables in multivariate Cox proportional hazards regression model predicting over-all survival in Docetaxel treated patients.

|                 | HR   | 95%CI     | P-Value |
|-----------------|------|-----------|---------|
| Age             | 0.94 | 0.48-1.83 | 0.87    |
| Type of Disease | 1.27 | 0.56-2.90 | 0.55    |
| PSA levels      | 1.0  | 1.0-1.002 | 0.15    |
| tALP (IU/L)     | 1    | 0.99-1.0  | 0.47    |
| Hb (g/L)        | 0.98 | 0.96-0.99 | 0.03    |
| NLR >5          | 0.78 | 0.37 -1.6 | 0.50    |

Hazard Ratio (HR), Prostate specific antigen (PSA) level, hemoglobin level (Hb), total alkaline phosphatase (tALP), and Neutrophil-to-lymphocyte ratio (NLR) was calculated as the ratio of the absolute neutrophil count (ANC) divided by the absolute lymphocyte count (ALC).

**Figure S3:** Evolution of absolute neutrophil count and absolute lymphocyte count during therapy in docet-axel treated patients.

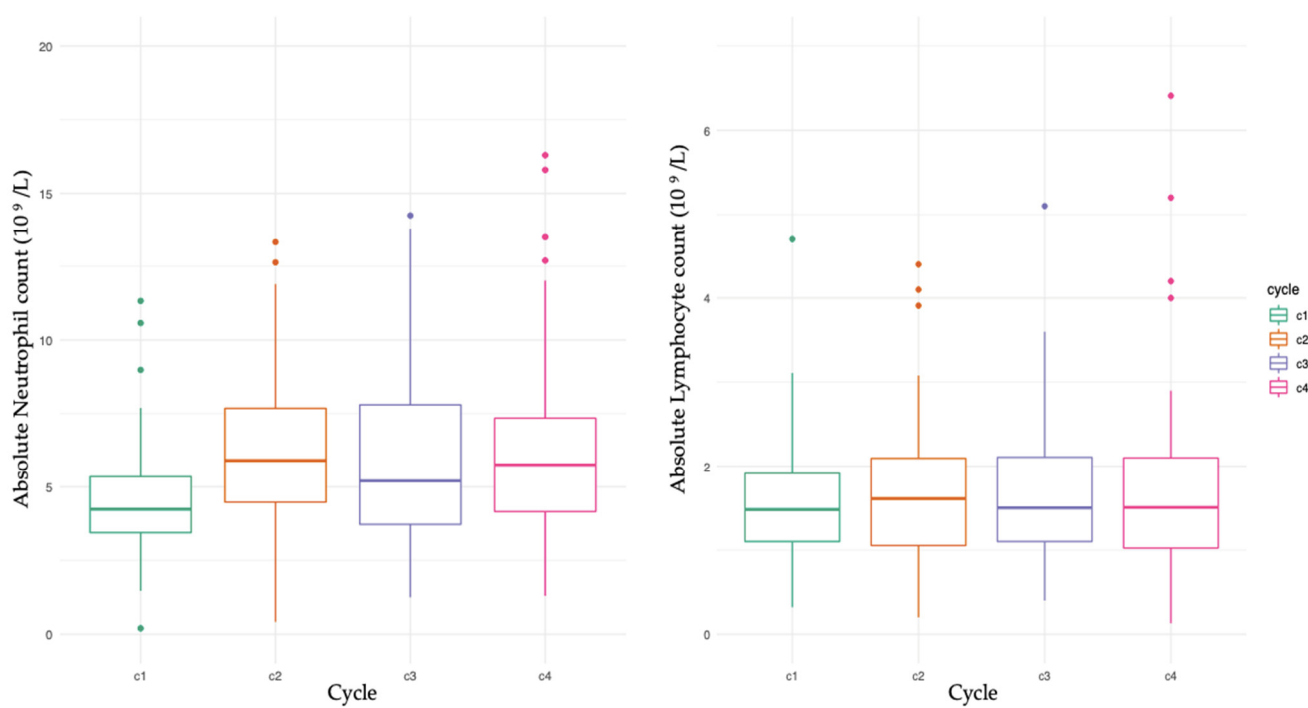

Supplement: s1 [file s1]
